# Supplementary material for: The Antimicrobial Potential of the Hop (Humulus lupulus L.) Extract against Staphylococcus aureus and Oral Streptococci
Source: MDPI journal article supplement (doi:10.3390/ph17020162), 2024-01-27
Supplement: s1 [file s1]

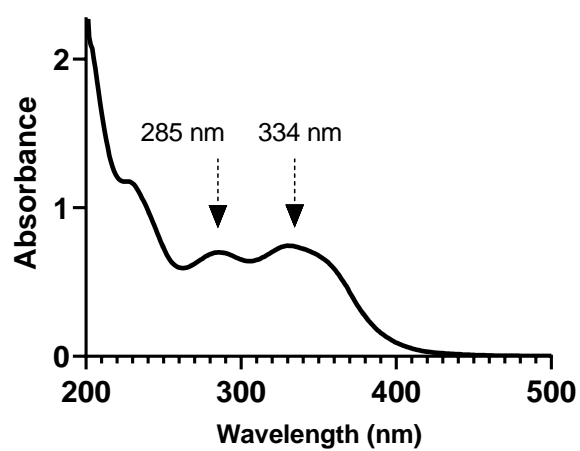

**Figure S1.** UV-Vis spectra of the working solution of the final extract at a concentration of 40 mg/mL after purification. The absorbance ( $\text{cm}^{-1}$ ) has been measured in the wavelength range of 200–500 nm. Arrows show absorbance peaks at  $\lambda = 285$  nm and  $\lambda = 334$  nm that correspond to the characteristic absorption lines of APs.

RT: 0.07 - 40.07

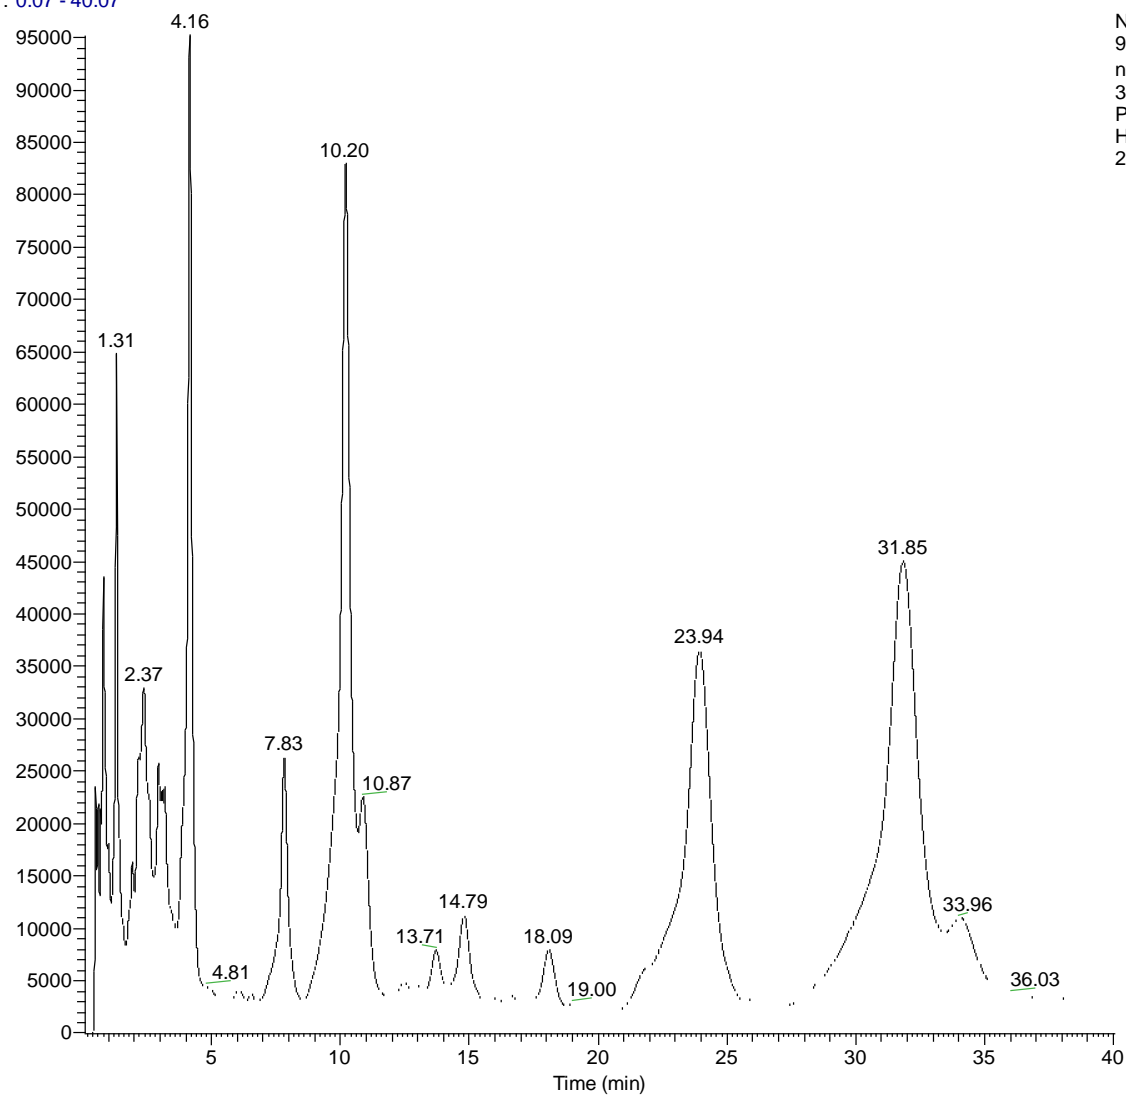

NL:  
9.52E4  
nm=334.5-  
335.5  
PDA  
Humulus-  
2023-34

**Figure S2.** The typical LC-MS chromatogram of the extract *H. lupulus*. The LC-MS performed on Thermo finnigan LCQ fleet equipped with BDS hypersil C 18 2×150 mm column. The chromatography has been performed at isocratic flow at 0,8 ml/min in a solvent system of acetonitrile-water (10% formic acid and 0.01% i-propanol) in a ratio of 1:1 (v/v) and detection on a PDA detector at 335 nm.

**Table S1.** The chemical structures of the main active compounds (2',4',6',4-tetrahydroxy-3'-geranylchalcone and acylphloroglucides) identified in the hop extract by LC-MS

|   |                                            |                   |                                                                                      |
|---|--------------------------------------------|-------------------|--------------------------------------------------------------------------------------|
| 1 | Humulone                                   | $C_{21}H_{30}O_5$ | 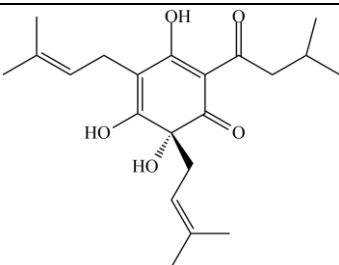   |
| 2 | Cohumulone                                 | $C_{20}H_{28}O_5$ |    |
| 3 | Lupulone                                   | $C_{26}H_{38}O_4$ |   |
| 4 | Colupulone                                 | $C_{26}H_{38}O_4$ |  |
| 5 | 2',4',6',4-tetrahydroxy-3'-geranylchalcone | $C_{25}H_{28}O_5$ |  |
